# Supplementary material for: Quasi-one-dimensional graphene nanoribbon-supported MoS2 nanosheets for enhanced hydrogen evolution reaction
Source: Royal Society of Chemistry journal article supplement (doi:10.1039/c5ra27180k), 2016-01-01
Supplement: c5ra27180k1.pdf [file c5ra27180k1.pdf]

**Quasi-one-dimensional graphene nanoribbons supported MoS<sub>2</sub>  
nanosheets for enhanced hydrogen evolution reaction**

**Electronic Supplementary Information**

Huahao Gu,<sup>a</sup> Longsheng Zhang,<sup>a</sup> Yunpeng Huang,<sup>a</sup> Youfang Zhang,<sup>a</sup> Wei Fan\*<sup>b</sup> and  
Tianxi Liu\*<sup>a,b</sup>

*<sup>a</sup>State Key Laboratory of Molecular Engineering of Polymers, Department of  
Macromolecular Science, Fudan University, 220 Handan Road, Shanghai 200433, P.  
R. China. E-mail: txliu@fudan.edu.cn, Tel: +86-21-55664197; Fax: +86-21-  
65640293.*

*<sup>b</sup>State Key Laboratory of Modification of Chemical Fibers and Polymer Materials,  
College of Materials Science and Engineering, Donghua University, 2999 North  
Renmin Road, Shanghai 201620, P. R. China. E-mail: 10110440003@fudan.edu.cn*

## **Figure captions**

**Fig. S1** XRD patterns of MWCNTs and GONRs.

**Fig. S2** FESEM image of GNR@MoS<sub>2</sub>-1 hybrid and its corresponding EDS mapping with atomic ratio.

**Fig. S3** (A) FESEM image of MoS<sub>2</sub> and (B) TEM image of GNRs.

**Fig. S4** TEM image of MWCNT@MoS<sub>2</sub> hybrid.

**Fig. S5** Raman spectra of GONRs, GNRs and GNR@MoS<sub>2</sub>-1 hybrid.

**Fig. S6** TGA curves of GNRs, MoS<sub>2</sub> and GNR@MoS<sub>2</sub> hybrids.

**Fig. S7** Enlarged figure of the Nyquist plots of GNRs, MoS<sub>2</sub>, MWCNT@MoS<sub>2</sub> and GNR@MoS<sub>2</sub>-1 hybrids.

**Table S1.** Comparison of the HER performance between different materials.

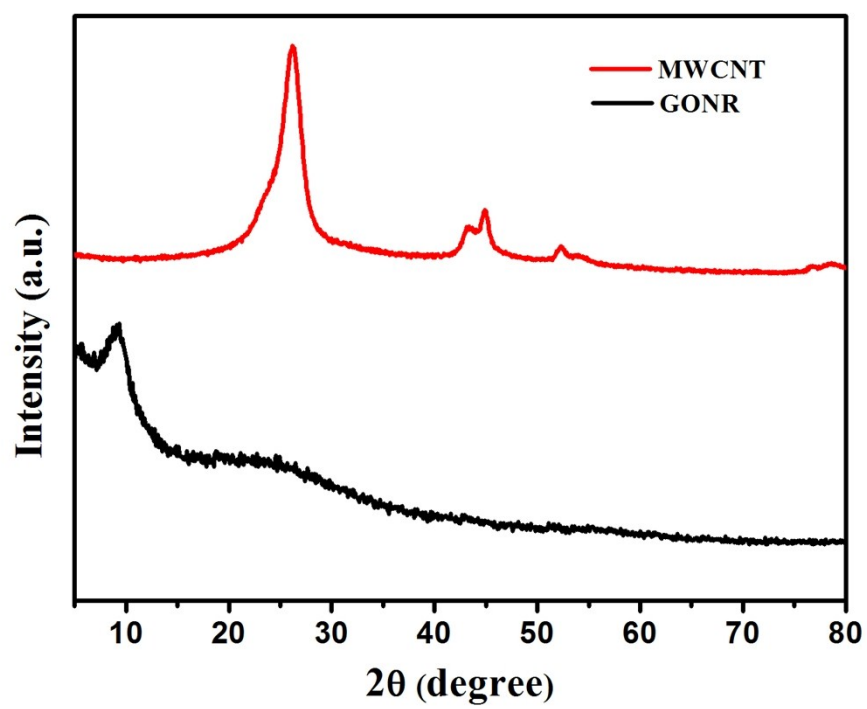

Fig. S1

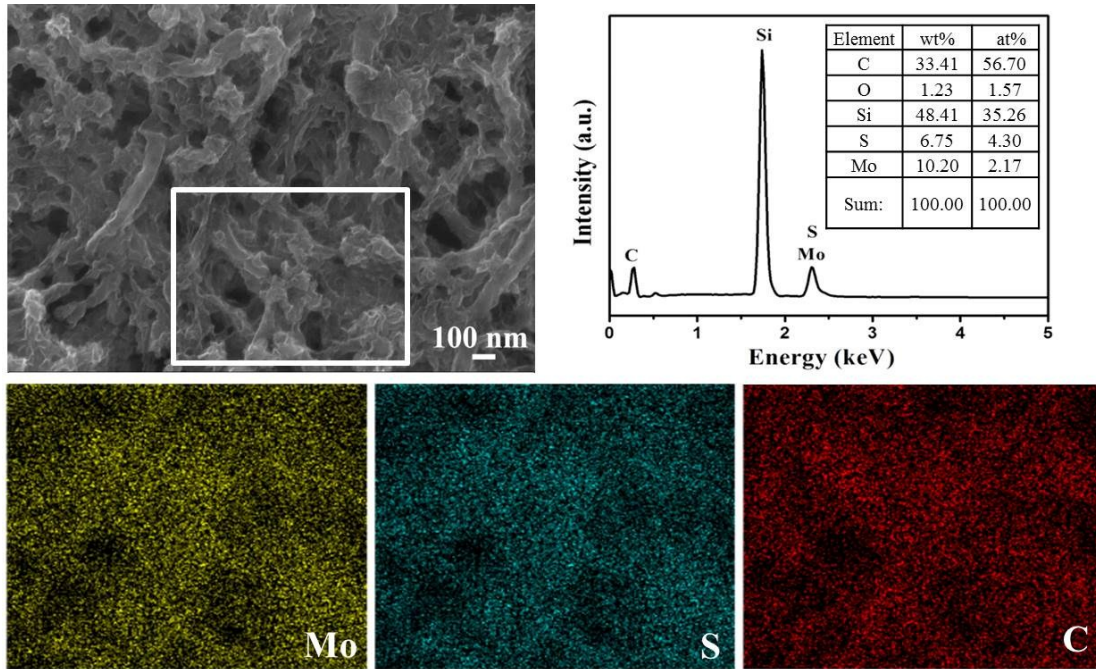

Fig. S2

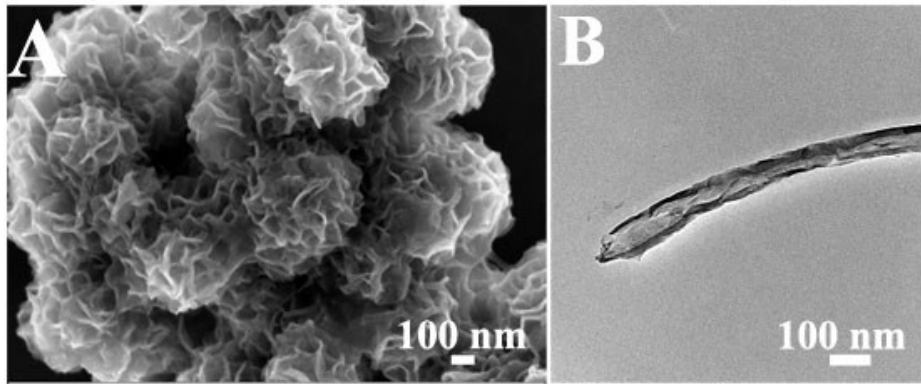

Fig. S3

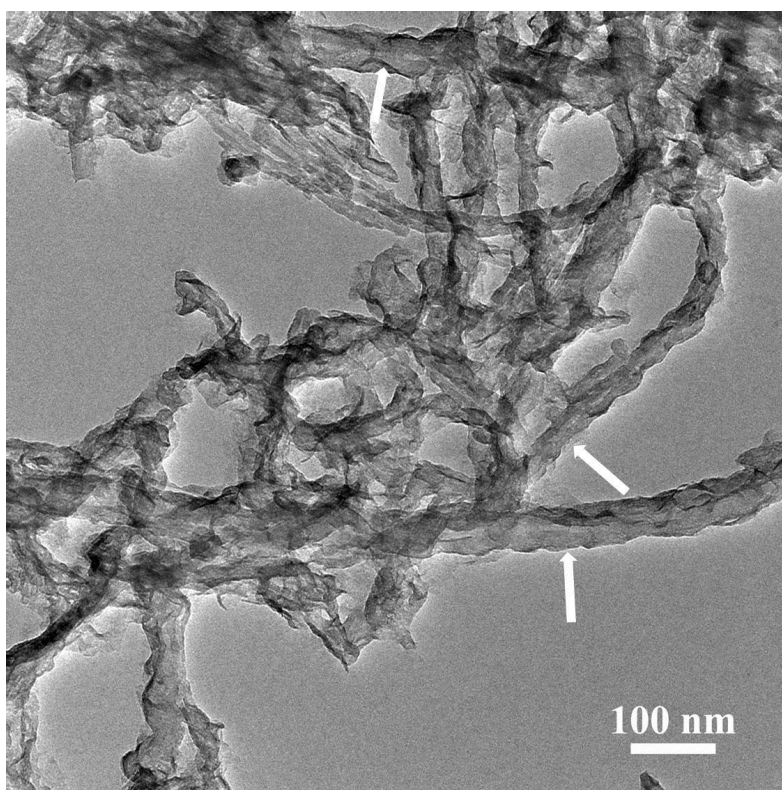

**Fig. S4**

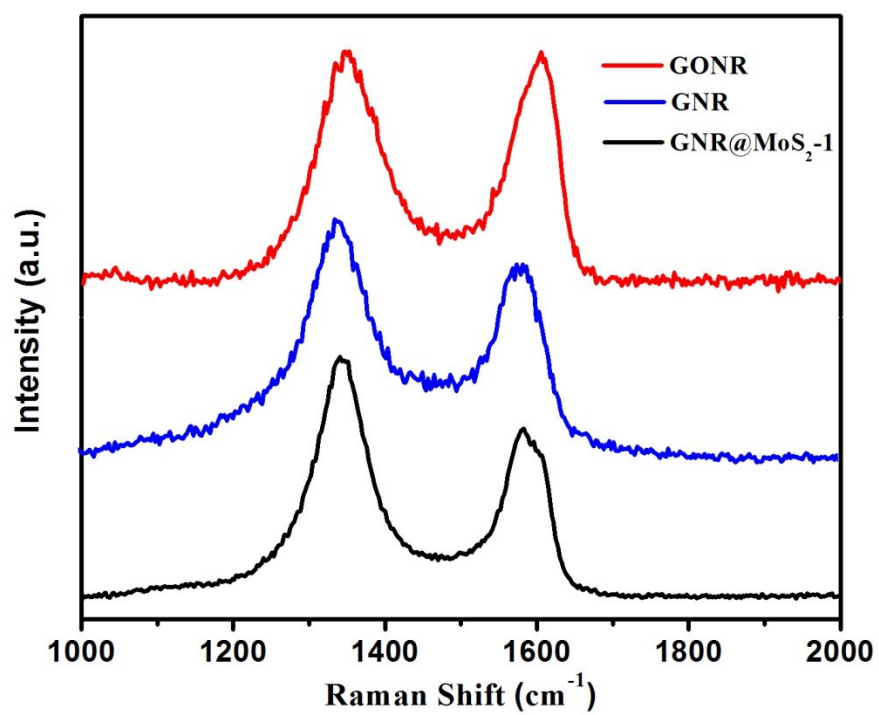

Fig. S5

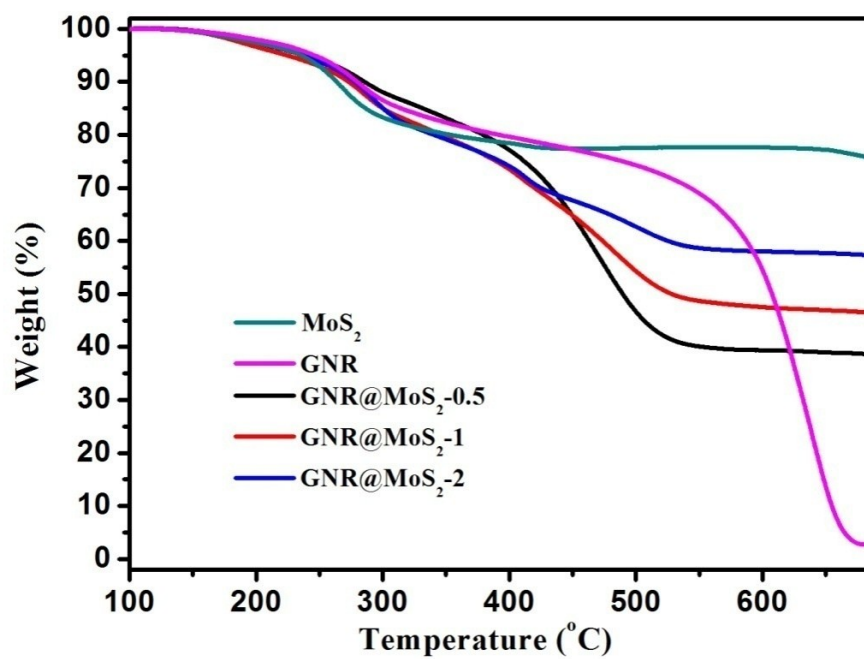

Fig. S6



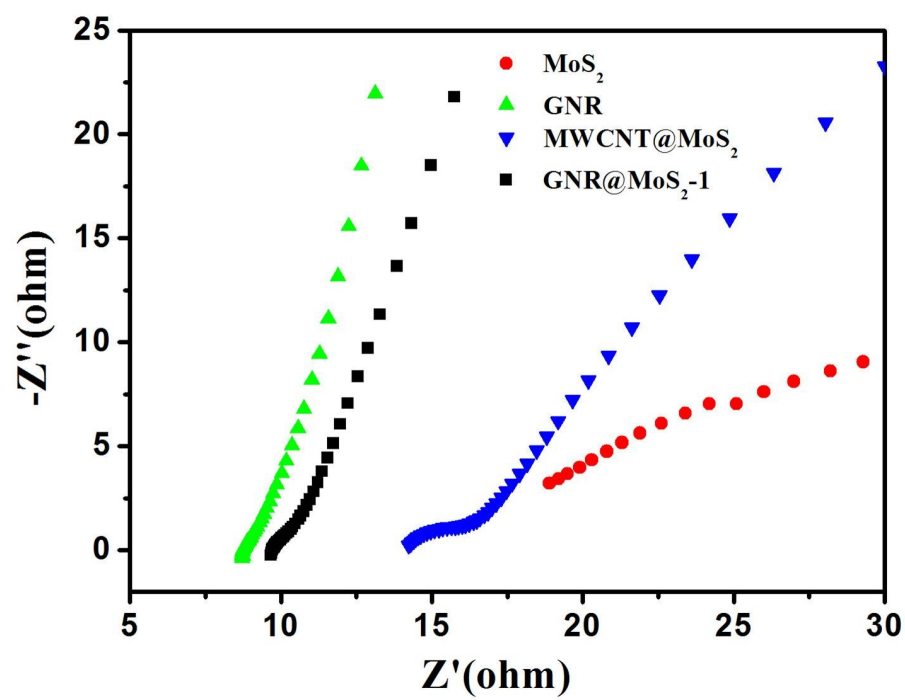

Fig. S7

**Table S1**

| Sample                                                              | Tafel slope<br>(mV per decade) | Onset potential<br>(V vs. RHE) | Refs         |
|---------------------------------------------------------------------|--------------------------------|--------------------------------|--------------|
| MoS <sub>2</sub> nanoflowers coated on reduced graphene oxide paper | 95                             | -0.19                          | 1            |
| Low crystalline MoS <sub>2</sub> nanosheet-coated CNTs              | 44.6                           | -0.09                          | 2            |
| MoS <sub>2</sub> formed on mesoporous graphene                      | 42                             | -0.1                           | 3            |
| Ultrathin MoS <sub>2</sub> -coated carbon nanospheres               | 53                             | -0.14                          | 4            |
| MoS <sub>2</sub> nanoparticles grown on graphene                    | 41                             | -0.1                           | 5            |
| Carbon paper loaded MoS <sub>2</sub>                                | 120                            | -0.2                           | 6            |
| Graphene film-confined molybdenum sulfide nanoparticles             | 43                             | -0.13                          | 7            |
| MoS <sub>x</sub> grown on graphene-protected 3D Ni foams            | 42.8                           | -0.109-0.141                   | 8            |
| MoS <sub>2</sub> nanosheets decorated graphene nanoribbon           | 43.4                           | -0.11                          | Present work |

## References:

- 1 C. B. Ma, X. Y. Qi, B. Chen, S. Y. Bao, Z. Y. Yin, X. J. Wu, Z. M. Luo, J. Wei, H. L. Zhang and H. Zhang, *Nanoscale*, 2014, **6**, 5624-5629.
- 2 Y. Yan, X. M. Ge, Z. L. Liu, J. Y. Wang, J. M. Lee and X. Wang, *Nanoscale*, 2013, **5**, 7768.
- 3 L. Liao, J. Zhu, X. J. Bian, L. Zhu, M. D. Scanlon, H. H. Girault and B. H. Liu, *Adv. Funct. Mater.*, 2013, **23**, 5326-5333.
- 4 W. H. Hu, G. Q. Han, Y. R. Liu, B. Dong, Y. M. Chai, Y. Q. Liu and C. G. Liu, *Int. J. Hydrogen Energy*, 2015, **40**, 6552-6558.
- 5 Y. G. Li, H. L. Wang, L. M. Xie, Y. Y. Liang, G. S. Hong and H. J. Dai, *J. Am. Chem. Soc.*, 2011, **133**, 7296-7299.
- 6 J. Bonde, P. G. Moses, T. F. Jaramillo, J. K. Norskov and I. Chorkendorff, *Faraday Discuss.*, 2009, **140**, 219-231.
- 7 Z. H. Pu, Q. Liu, A. M. Asiri, A. Y. Obaid and X. P. Sun, *J. Power Sources*, 2014, **263**, 181-185.
- 8 Y. H. Chang, C. T. Lin, T. Y. Chen, C. L. Hsu, Y. H. Lee, W. J. Zhang, K. H. Wei and L. J. Li, *Adv. Mater.*, 2013, **25**, 756-760.
